# Supplementary material
Source: PubMed Central journal article supplement (PMC5844701)

Supplementary Figure 1 A

## Development\_TGF-beta-dependent induction of EMT via MAPK

HOB + ACTH -10 pM - TGF-beta receptor type II, Shc, and FAK1 increased (p = 0.01)

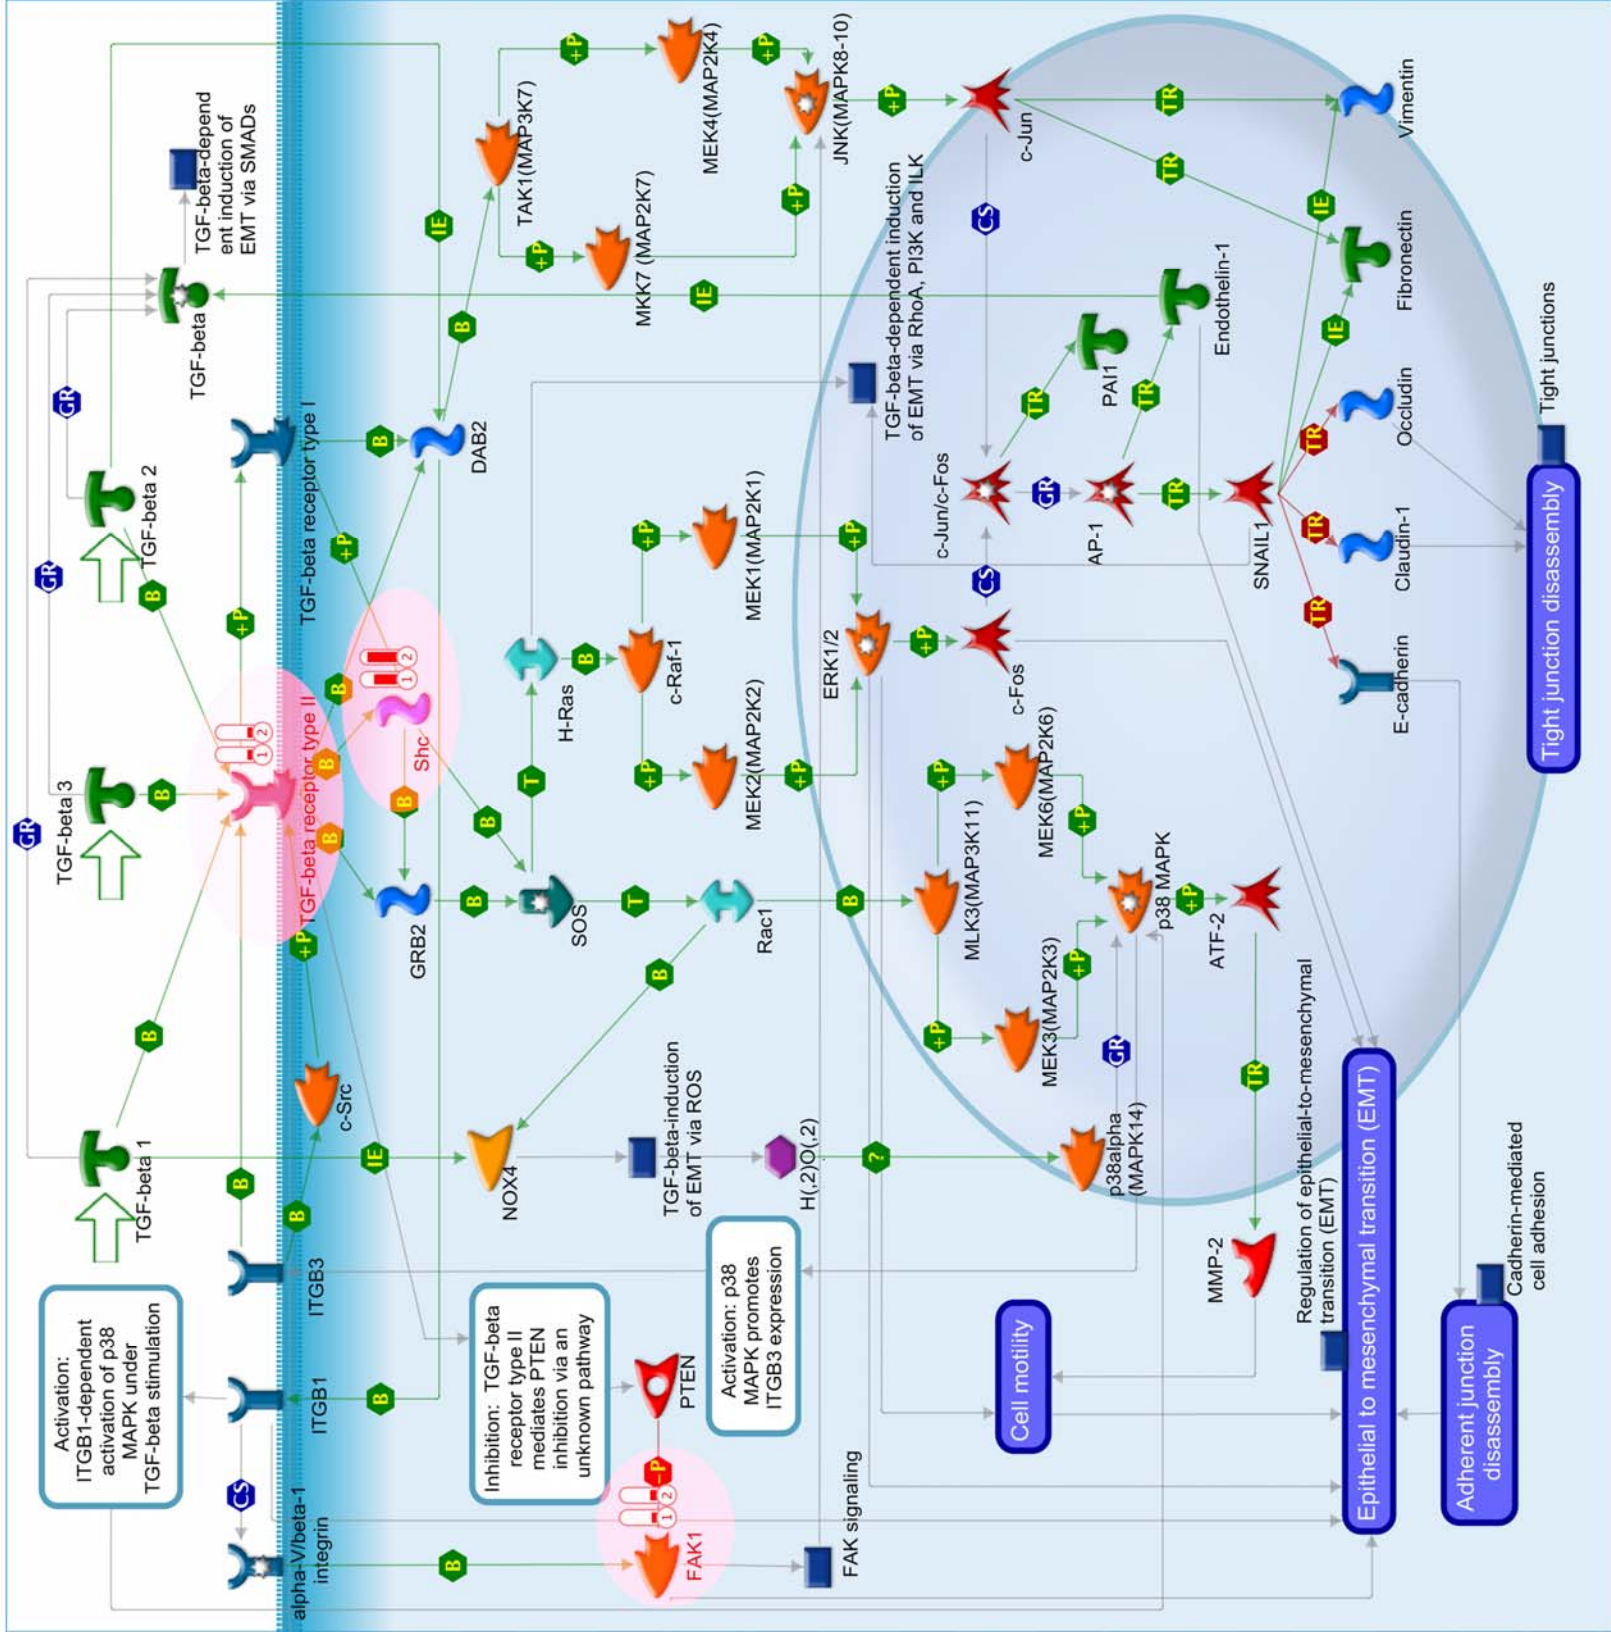

Supplement: NIHMS941271-supplement-Figure_1_A.pdf [file NIHMS941271-supplement-Figure_1_A.pdf]
