# Supplementary material
Source: PubMed Central journal article supplement (PMC5844701)

## Development\_Hedgehog and PTH signaling pathways in bone and cartilage development

HOB + ACTH - 10 pM - VDR increased -  $p = 0.0005$

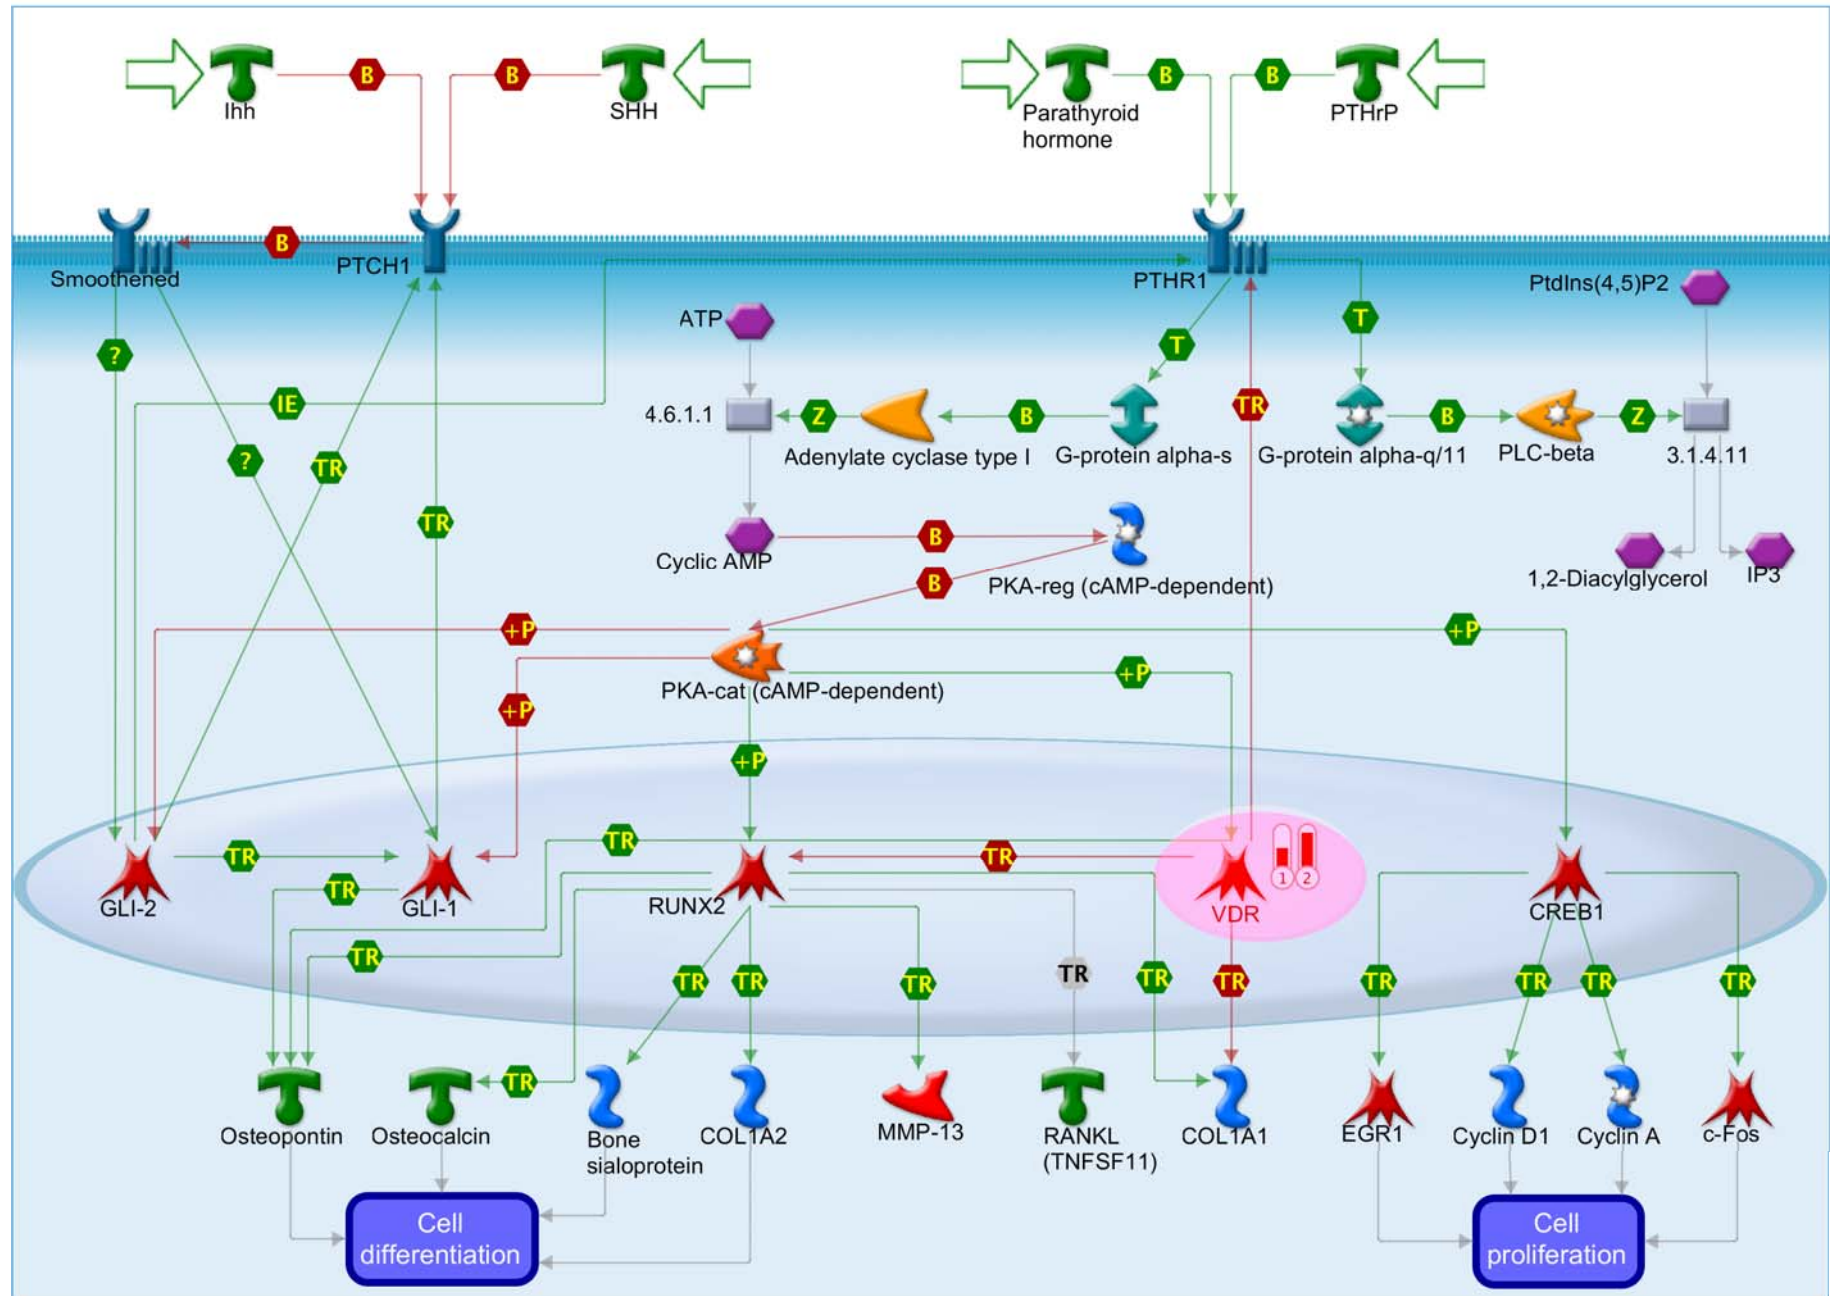

Supplement: NIHMS941271-supplement-Figure_1_B.pdf [file NIHMS941271-supplement-Figure_1_B.pdf]
