# Supplementary material
Source: PubMed Central journal article supplement (PMC5844701)
Supplement: NIHMS941271-supplement-Figure_1_C.pdf [file NIHMS941271-supplement-Figure_1_C.pdf]

Supplementary Figure 1C

### Cell adhesion\_Cell-matrix glycoconjugates

HOB + ACTH - 10 pM - Cartilage linking protein 1 increased p = 0.0001

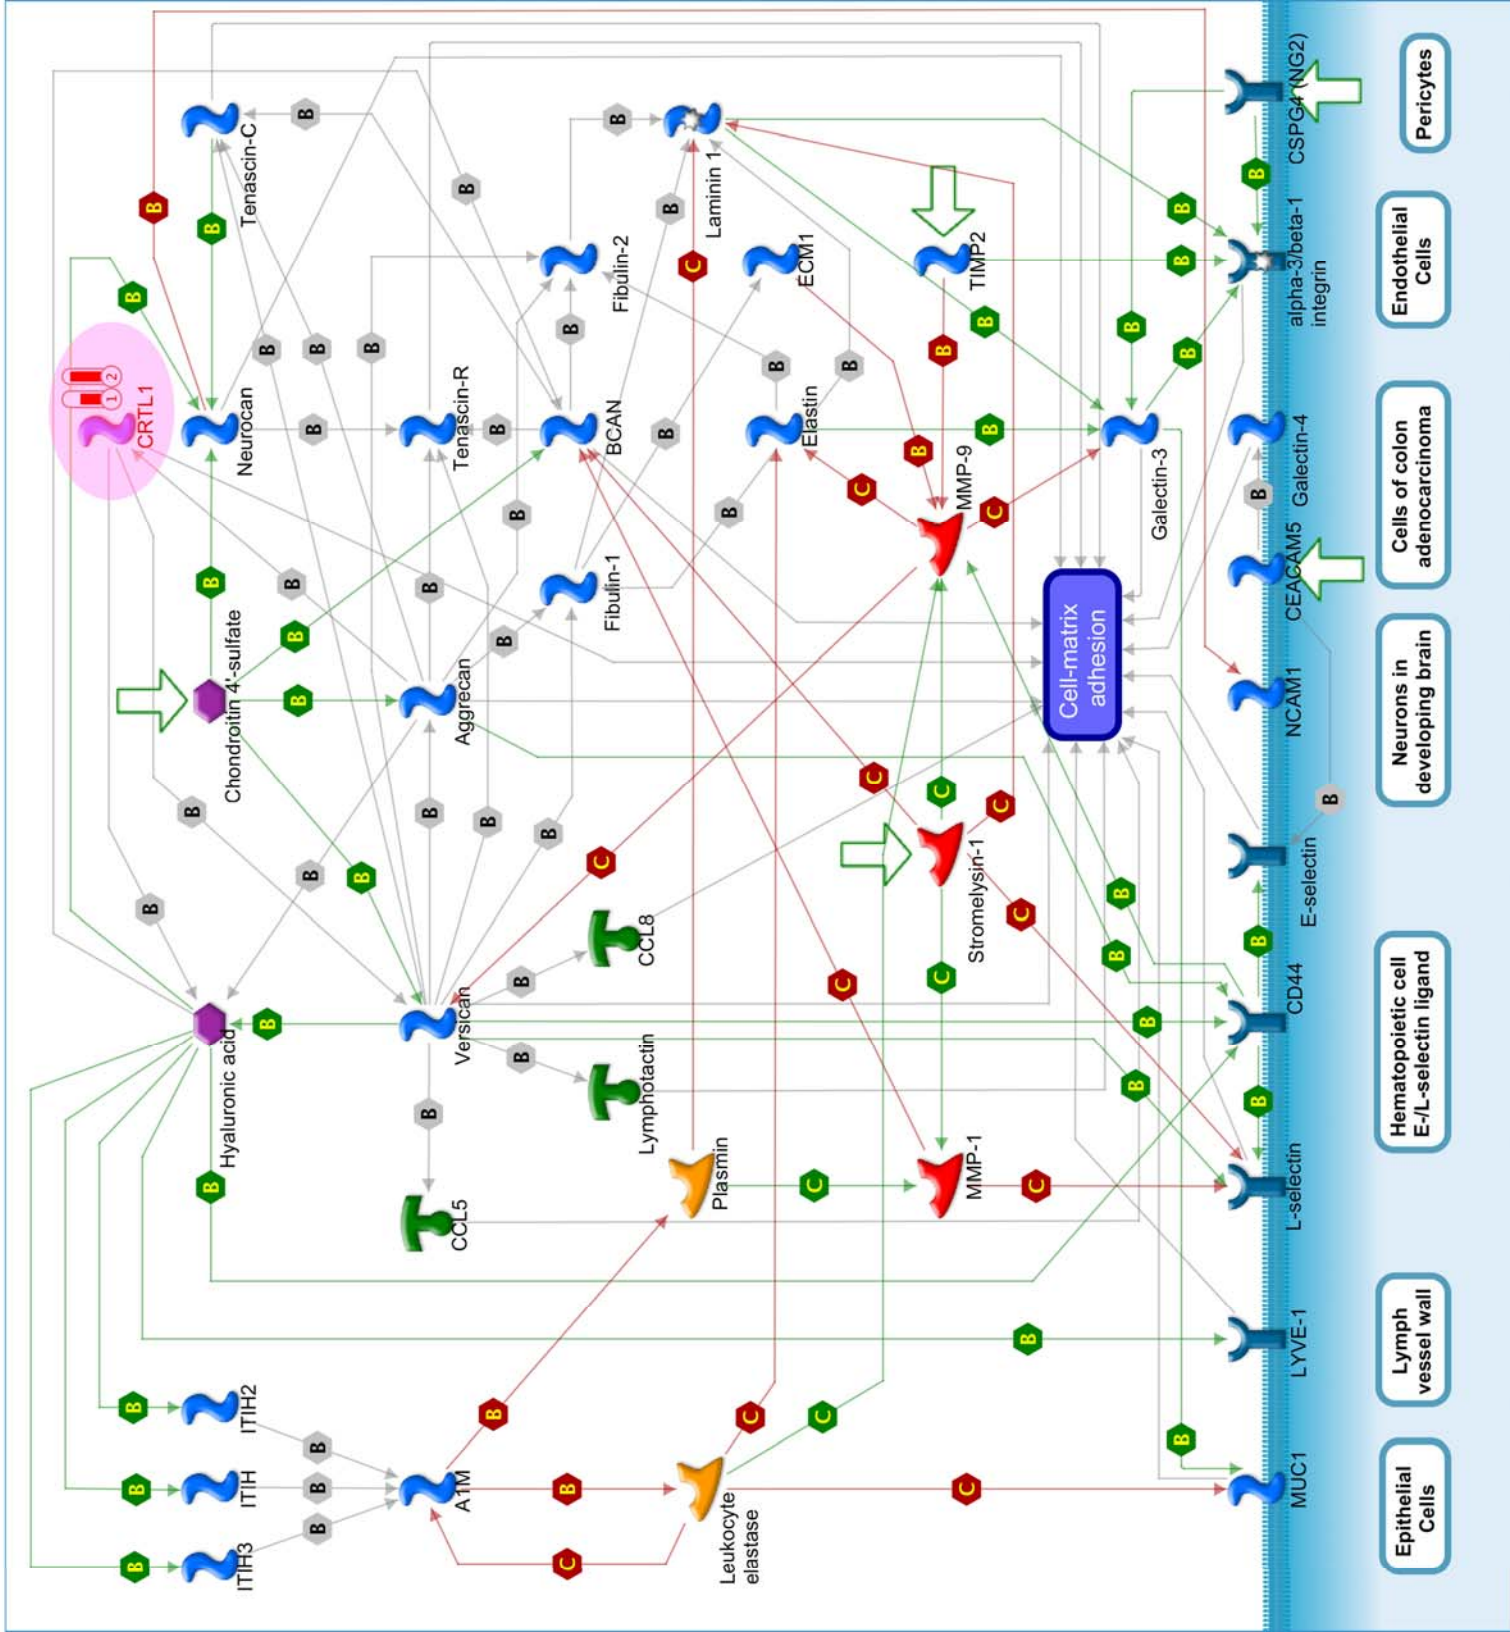

Epithelial Cells

Lymph vessel wall

Hematopoietic cell E-/L-selectin ligand

Neurons in developing brain

Cells of colon adenocarcinoma

Endothelial Cells

Pericytes
