# Supplementary material
Source: PubMed Central journal article supplement (PMC5844701)

Supplementary Figure 2 B

### Cell adhesion\_ ECM remodeling

HOB + Vit D - 10 nM - Collagen I increased (Col1A1 - p = 0.0004, Col1A2 - p = 0.0002)

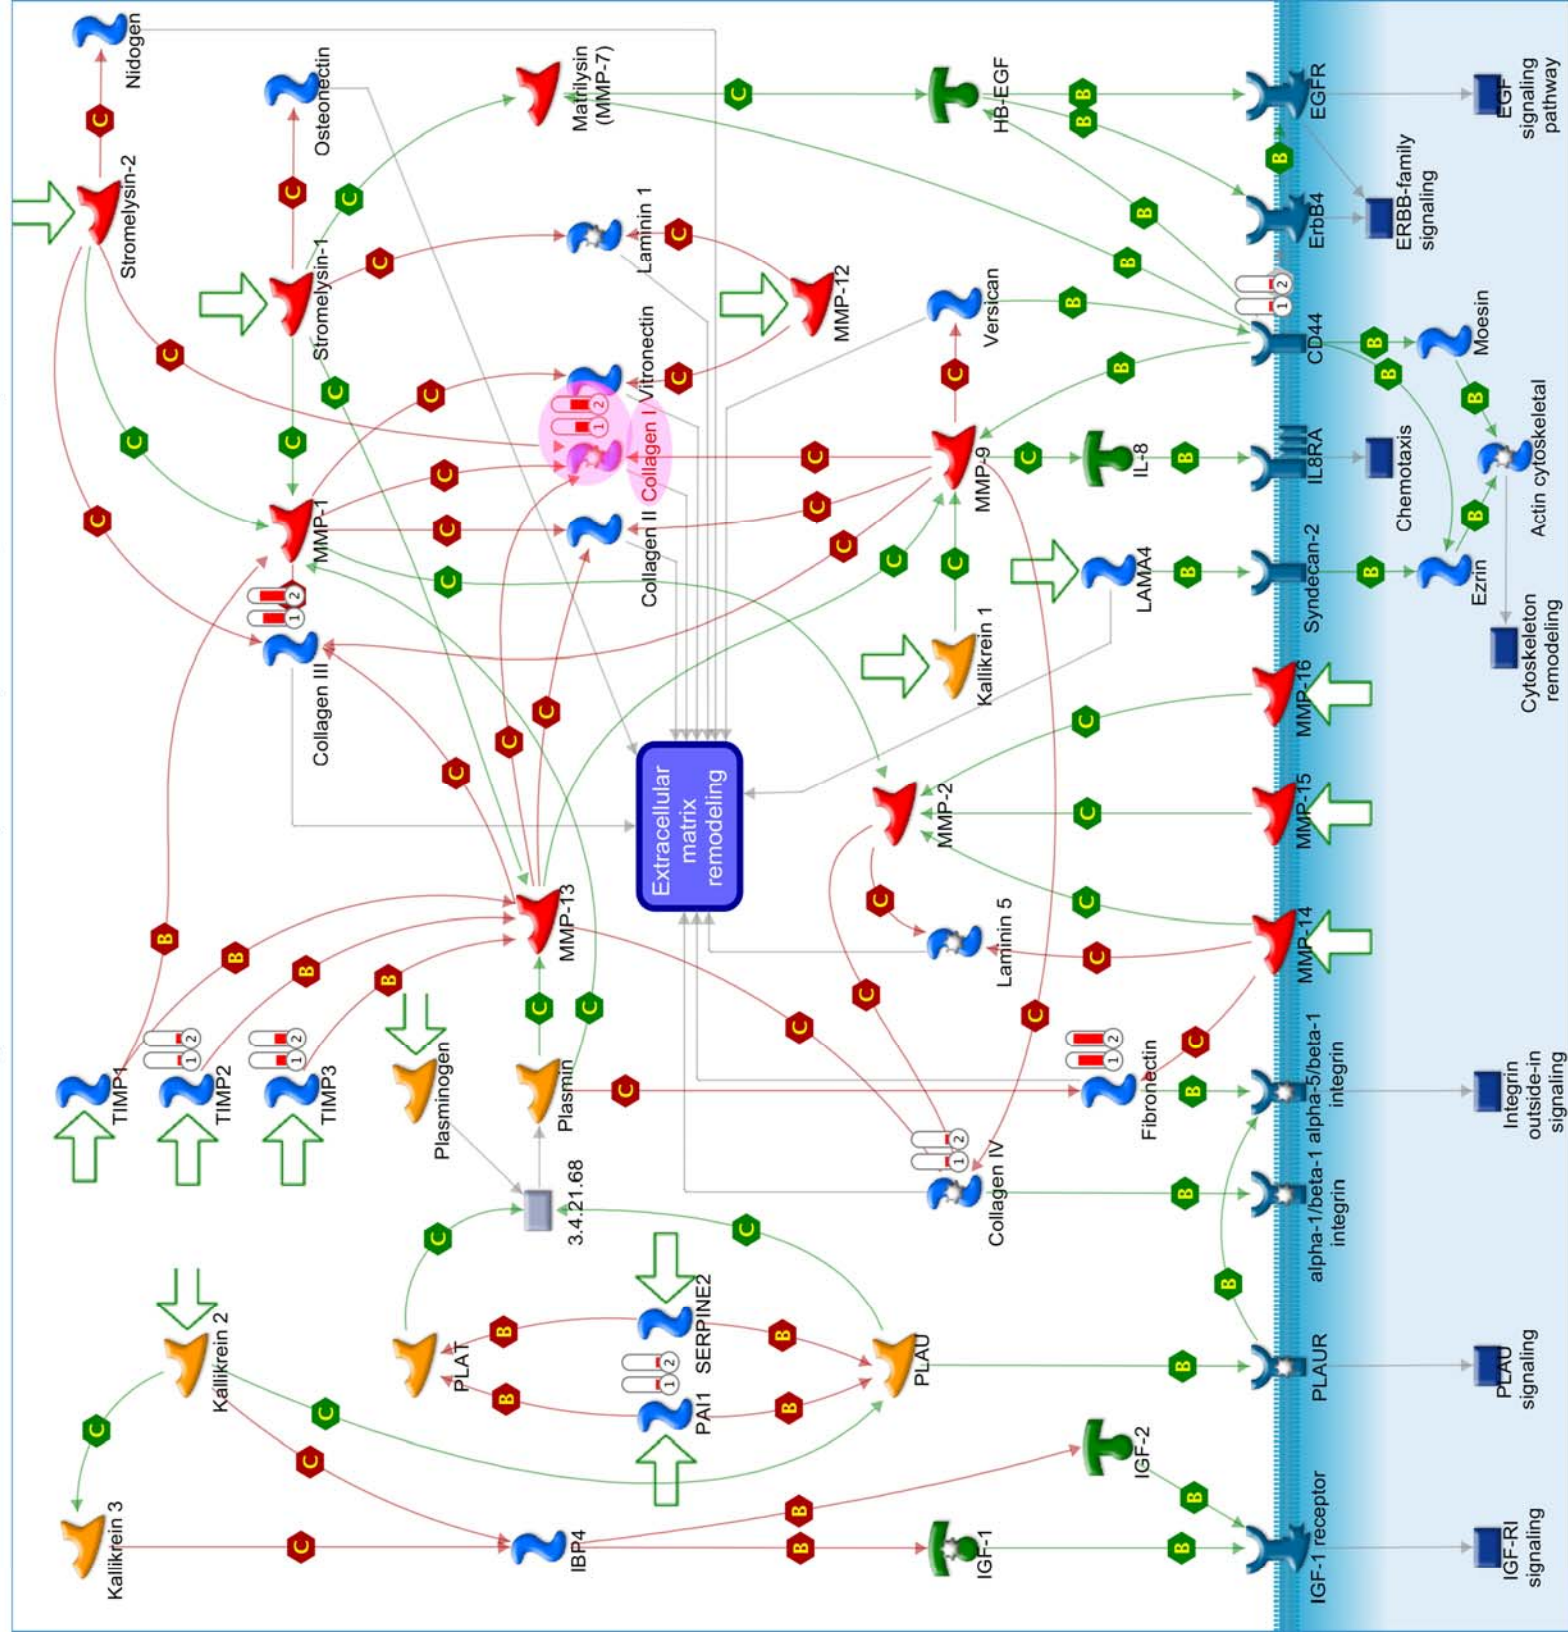

Supplement: NIHMS941271-supplement-Figure_2_B.pdf [file NIHMS941271-supplement-Figure_2_B.pdf]
