# Supplementary material
Source: PubMed Central journal article supplement (PMC5844701)

Supplementary Figure 2 C

### Development\_FGF-family signaling

HOB + Vit D - 10 nM - FGFR1 (p = 0.007),

Shc (p = 0.001), SHP2 (p = 0.005), AKT (p = 0.01), ERK2 (p = 0.007) increased

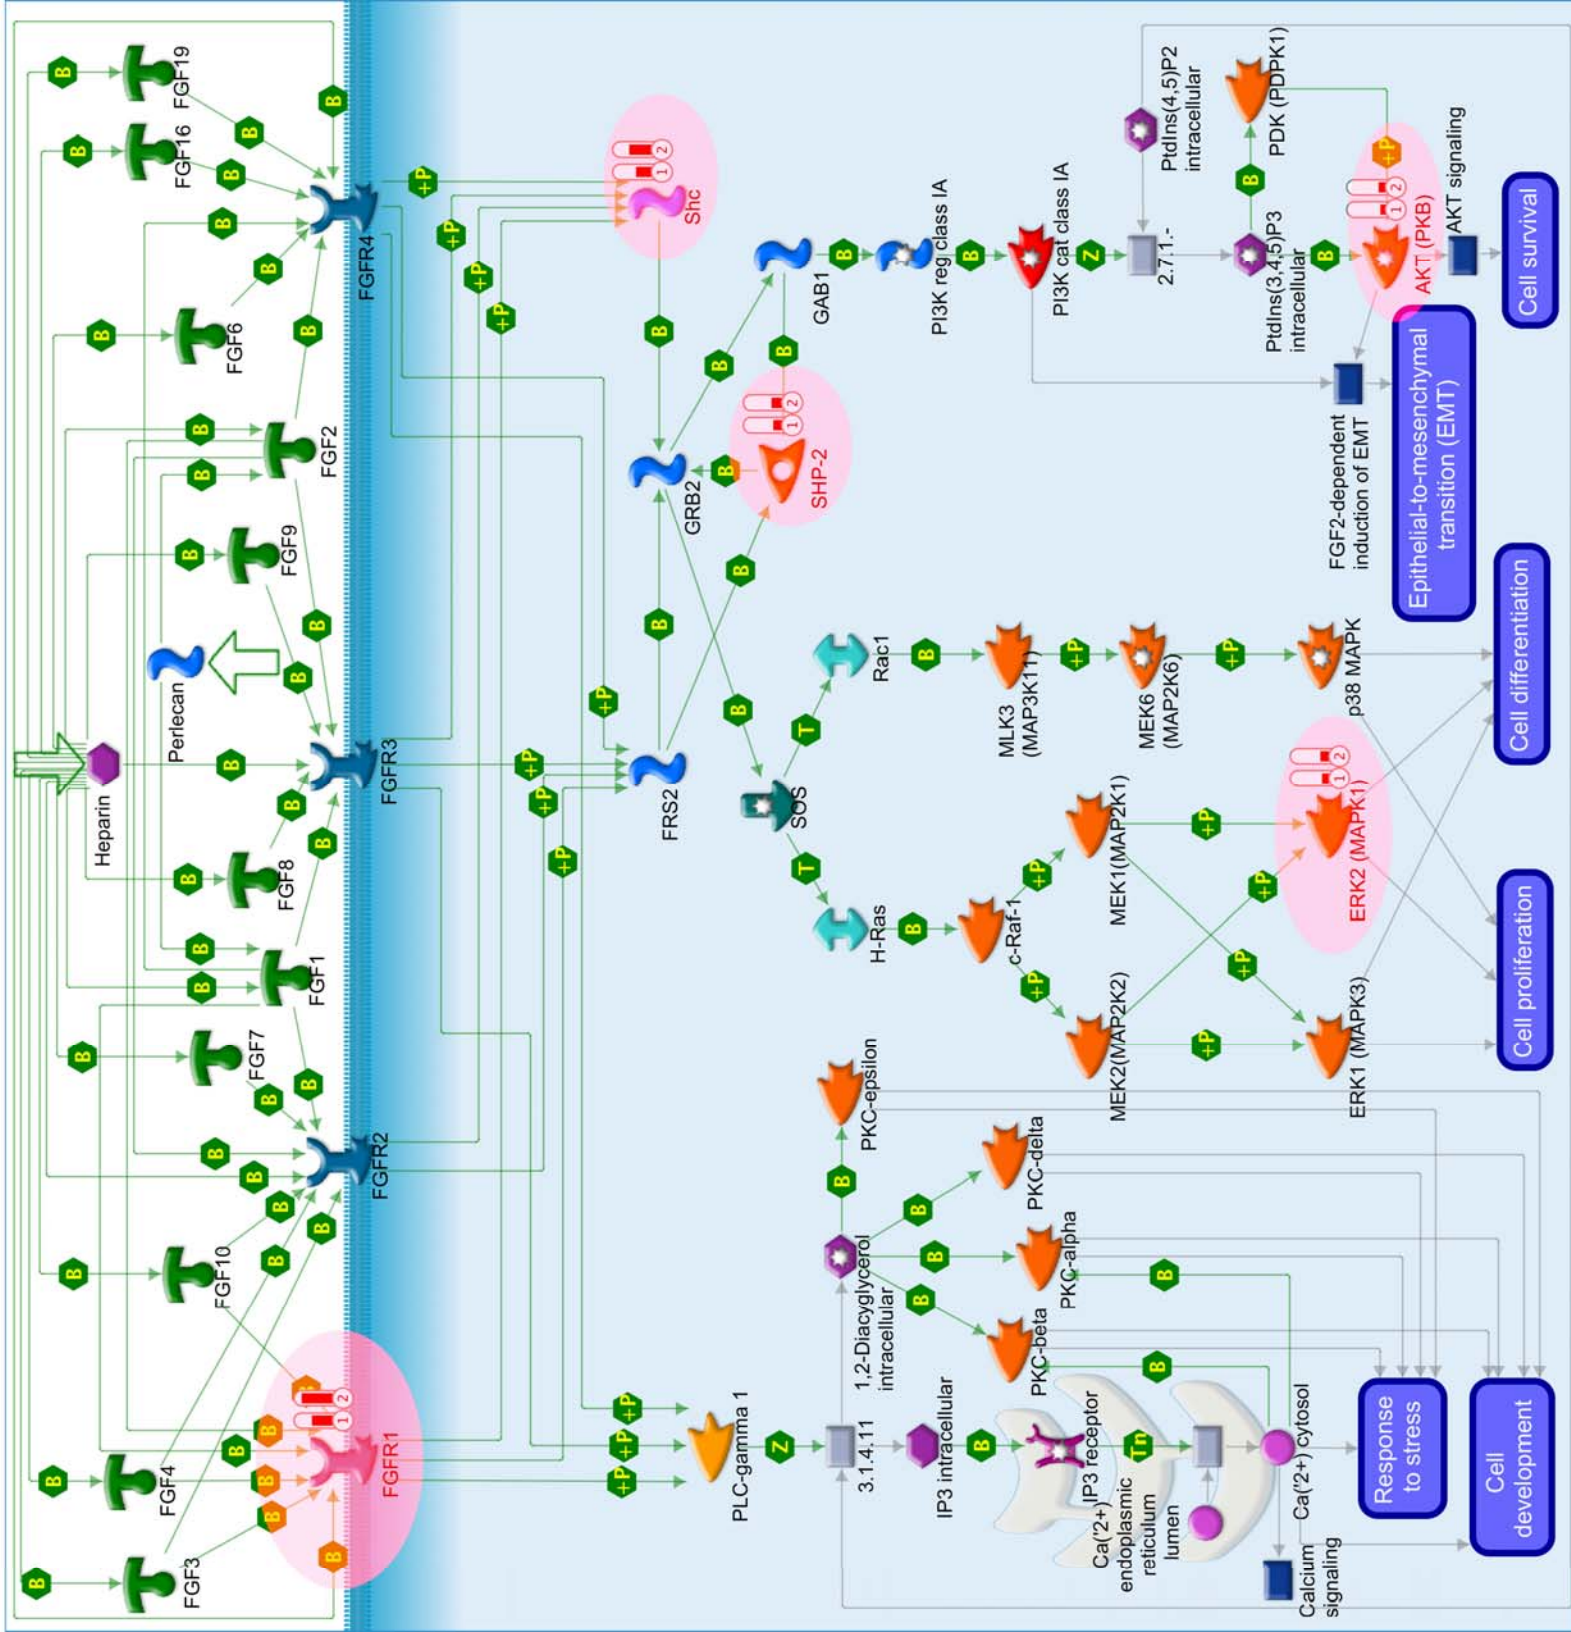

Supplement: NIHMS941271-supplement-Figure_2_C.pdf [file NIHMS941271-supplement-Figure_2_C.pdf]
