# Supplementary material
Source: PubMed Central journal article supplement (PMC5844701)

Supplementary Figure 2 D

## Development\_VEGF signaling via VEGFR2 - generic cascades

HOB + Vit D - 10 nM - VEGF-A ( $p = 0.04$ ), and HSP90 ( $p = 0.007$ ) increased

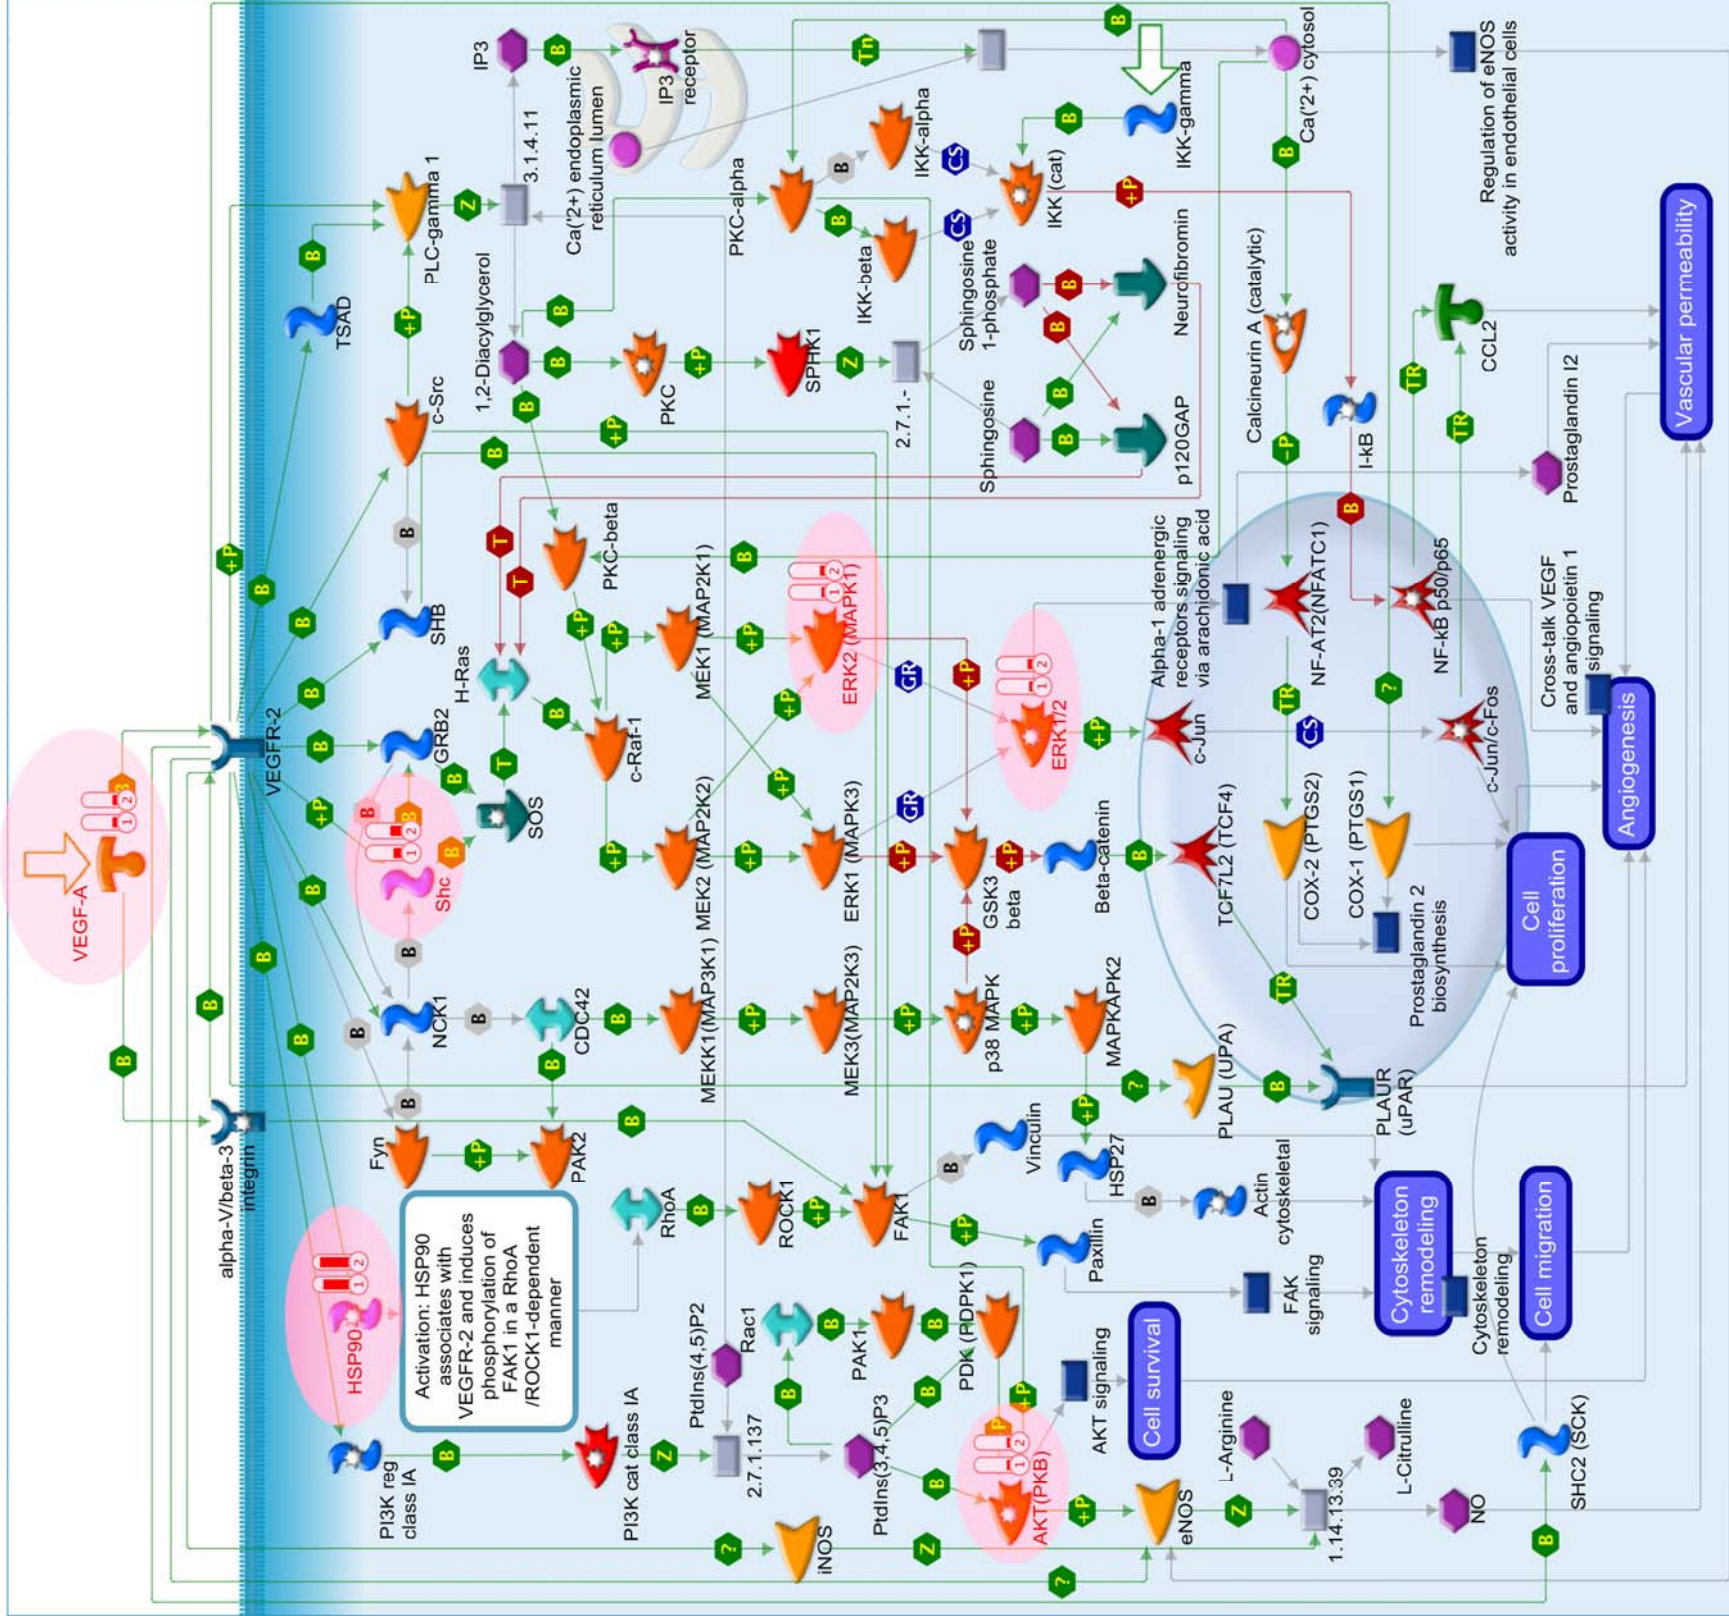

Supplement: NIHMS941271-supplement-Figure_2_D.pdf [file NIHMS941271-supplement-Figure_2_D.pdf]
